# Supplementary material for: Green dipolar aprotic solvents for the dynamic polycondensation of high-performance polyimide membranes
Source: Royal Society of Chemistry journal article supplement (doi:10.1039/d4gc04279d), 2024-01-01
Supplement: d4gc04279d1.pdf [file d4gc04279d1.pdf]

# Greener Dipolar Aprotic Solvents for the Dynamic Polycondensation of High-Performance Polyimide Membranes

E. San José<sup>a,b</sup>, M.R. de la Viuda<sup>\*a,b</sup>, F.J. Carmona<sup>a,b</sup>, C. Soto<sup>a,b</sup>, L. Palacio<sup>a,b</sup>, P. Prádanos<sup>a,b</sup>,

A. Hernández<sup>a,b</sup>, A. Tena<sup>\*a,b</sup>

<sup>a</sup> Surfaces and Porous Materials (SMAP), CSIC-Associated Research Unit, Universidad de Valladolid, 47011, Valladolid, Spain;

<sup>b</sup> Institute of Sustainable Processes (ISP), 47011, Valladolid, Spain;

Email: [monicarosa.viuda@uva.es](mailto:monicarosa.viuda@uva.es)

Email: [a.tena@uva.es](mailto:a.tena@uva.es)

## Supporting information

The list of solvents analyzed in this work can be found in Table S1 and Table S2. While Table S1 is a general list of the solvents analyzed, including apolar and polar protic solvents, the Table S2 is including in detail the polar aprotic solvents analyzed as well as their dielectric constant, flash point.

The code of colors employed in this work is represented as follows:

| Color | Reason to be excluded                                |
|-------|------------------------------------------------------|
|       | Safety Criteria                                      |
|       | Health Criteria                                      |
|       | Environmental Criteria                               |
|       | Specific Criteria – synthesis and membrane formation |
|       | Selected                                             |

Table S1. List of apolar and polar protic solvents analyzed in this work organized by alphabetical order.

| Apolar solvents |                      |    |                     | Polar protic solvents |                   |    |                            |
|-----------------|----------------------|----|---------------------|-----------------------|-------------------|----|----------------------------|
| 1               | 1,4-Dioxane          | 20 | Ethyl ether         | 1                     | Acetamide         | 20 | Isobutanol                 |
| 2               | Anisole              | 21 | Furan               | 2                     | Acetic acid       | 21 | Isopropanol                |
| 3               | Benzene              | 22 | Heptane             | 3                     | Benzyl acetate    | 22 | Isopropylamine             |
| 4               | Biphenyl             | 23 | Heptanoic acid      | 4                     | Benzyl alcohol    | 23 | Lactic acid                |
| 5               | Butanoic acid        | 24 | Hexane              | 5                     | n-Butanol         | 24 | Methanol                   |
| 6               | Butylamine           | 25 | Isoamyl acetate     | 6                     | Chloroacetic acid | 25 | Methyl acetate             |
| 7               | Butylbenzene         | 26 | Isopentane          | 7                     | Cyanoacetic acid  | 26 | Methyl lactate             |
| 8               | Caproic acid         | 27 | Linoleic acid       | 8                     | Ethanol           | 27 | Methy tert-butyl ether     |
| 9               | Carbon disulfide     | 28 | Naphtalene          | 9                     | Ethyl acetate     | 28 | Pyridine                   |
| 10              | Carbon tetrachloride | 29 | p-Cymene            | 10                    | Ethyl lactate     | 29 | tert-Butanol               |
| 11              | Chloroform           | 30 | Pentane             | 11                    | Ethylamine        | 30 | Tetrahydrofurfuryl alcohol |
| 12              | Cumene               | 31 | Succinimide         | 12                    | Ethylene glycol   | 31 | Water                      |
| 13              | Cyclohexane          | 32 | T-Amyl methyl ether | 13                    | Formic acid       |    |                            |
| 14              | Cyclohexanone        | 33 | Toluene             | 14                    | Furfuryl alcohol  |    |                            |
| 15              | Cyclopentane         | 34 | Triethylamine       | 15                    | Glycerol          |    |                            |
| 16              | Decane               | 35 | Turpentine          | 16                    | Hydrazine         |    |                            |
| 17              | Diethyl eter         | 36 | Xylene              | 17                    | Hydrochloric acid |    |                            |
| 18              | Dimethyl ether       | 37 | α-Pinene            | 18                    | Hydrogen peroxide |    |                            |
| 19              | D-Limonene           |    |                     | 19                    | Isoamyl alcohol   |    |                            |

Table S2. List of the Polar Aprotic solvent analyzed in this work ordered by their dielectric constant. It is highlighted color the solvents excluded from the selection (attending to the Table 1 of the main text). The solvent selected are simple presented in highlighted in green.

| Number | Solvent name             | CAS number | Dielectric constant | Flash Point / °C | Boiling Point / °C | H3xx statement |
|--------|--------------------------|------------|---------------------|------------------|--------------------|----------------|
| 1      | Diethyl carbonate        | 96-49-1    | 2.8                 | 143              | 248                | None           |
| 2      | Diisopropyl ether        | 108-20-3   | 3.9                 | -28              | 69                 | H336           |
| 3      | Dioctyl phthalate        | 117-84-0   | 5.1                 | 221              | 386                | H360           |
| 4      | Isobutyl acetate         | 110-19-0   | 5.1                 | 22               | 115                | H336           |
| 5      | n-Butyl acetate          | 123-86-4   | 5.1                 | 22               | 126                | H336           |
| 6      | Glycol diacetate         | 111-55-7   | 5.1                 | 82               | 186                | None           |
| 7      | Ethyl tert-butyl ether   | 637-92-3   | 5.2                 | -19              | 72                 | H336           |
| 8      | Butyl acrylate           | 141-32-2   | 5.2                 | -65              | 145                | H335           |
| 9      | Chlorobenzene            | 108-90-7   | 5.6                 | 29               | 132                | H332           |
| 10     | Diethyl sulfide          | 352-93-2   | 5.7                 | -7               | 92                 | H319           |
| 11     | Dimethyl ether           | 115-10-6   | 6.2                 | -4               | 25                 | none           |
| 12     | Isopropyl acetate        | 108-21-4   | 6.3                 | 2                | 89                 | H319           |
| 13     | Fluorobenzene            | 462-06-6   | 6.4                 | -15              | 85                 | H318           |
| 14     | N-butyl 2-pyrrolidone    | 2687-91-4  | 6.5                 | 108              | 241                | H319           |
| 15     | Cyclopentyl methyl ether | 5614-37-9  | 6.7                 | -1               | 106                | H302           |
| 16     | Dibutyl phthalate        | 84-74-2    | 6.7                 | 187              | 340                | H360           |
| 17     | Dimethyl carbonate       | 616-38-6   | 7.2                 | 16               | 90                 | None           |
| 18     | Tetrahydrofuran          | 109-99-9   | 7.6                 | -14              | 66                 | H351           |
| 19     | Methyl tetrahydrofuran   | 96-47-9    | 7.6                 | -11              | 80                 | H318           |
| 20     | N-Octyl pyrrolidone      | 2687-94-7  | 7.8                 | 142              | 170                | H314           |
| 21     | Chlorocyclohexane        | 542-18-7   | 7.9                 | 32               | 142                | H335           |
| 23     | Dichloromethane          | 75-09-2    | 8.9                 | n.a              | 40                 | H351           |
| 24     | Bromoethane              | 74-96-4    | 9.0                 | -118             | 38                 | H351           |
| 25     | Heptanal                 | 111-71-7   | 9.1                 | 48               | 153                | H319           |
| 26     | Diethyl succinate        | 123-25-1   | 10.4                | 90               | 217                | None           |
| 27     | p-Cresol                 | 1319-77-3  | 10.6                | 85               | 202                | H314           |
| 28     | Dichloroethane           | 75-34-3    | 10.7                | 13               | 84                 | H350           |
| 29     | Sulfolane                | 126-33-0   | 11.0                | 177              | 287                | H360           |
| 30     | Dimethyl isosorbide      | 5306-85-4  | 11.4                | 110              | 95                 | H335           |
| 31     | Cyrene                   | 53716-82-8 | 12.7                | 61               | 203                | H319           |
| 32     | Methylcyclohexanone      | 583-60-8   | 13.0                | -4               | 101                | H332           |
| 33     | Methyl isobutyl ketone   | 108-10-1   | 13.1                | 13               | 117                | H319           |
| 34     | N-Ethyl pyrrolidone      | 2687-91-4  | 15.7                | 91               | 97                 | H360           |
| 35     | Acetyl Bromide           | 506-96-7   | 16.2                | 110              | 74                 | H314           |
| 36     | Benzaldehyde             | 100-52-7   | 17.9                | 63               | 170                | H302           |
| 37     | Acetophenone             | 98-86-2    | 18.0                | 105              | 202                | H319           |
| 38     | Methyl ethyl ketone      | 78-93-3    | 18.5                | -6               | 80                 | H319           |
| 39     | Ethyl isocyanate         | 109-90-0   | 19.7                | -1               | 60                 | None           |
| 40     | Acetone                  | 67-64-1    | 20.7                | -18              | 6                  | H319           |
| 41     | Acetic anhydride         | 108-24-7   | 21.0                | 49               | 139                | H314           |
| 42     | Acetaldehyde             | 75-07-0    | 21.8                | -40              | 21                 | H350           |
| 43     | Acetylacetone            | 123-54-6   | 23.0                | 38               | 138                | H302           |
| 44     | Methyl nitrate           | 598-58-3   | 23.9                | 24               | 65                 | H336           |
| 45     | Benzonitrile             | 100-47-0   | 25.9                | 70               | 375                | H312           |
| 46     | Hexamethylphosphoramide  | 680-31-9   | 30                  | 144              | >200               | H350           |
| 47     | Pentaborane              | 19624-22-7 | 31.1                | 30               | 60                 | H336           |
| 48     | 1,3-Propanediol          | 504-63-2   | 32.0                | >100             | 214                | None           |
| 49     | 2-Pyrrolidone            | 616-45-5   | 32.2                | 129              | 245                | H360           |
| 50     | N-methyl-2-pyrrolidone   | 872-50-4   | 32.2                | 96               | 202                | H360           |
| 51     | Acrylonitrile            | 107-13-1   | 33.0                | -5               | 77                 | H350           |

|    |                                                    |              |      |     |     |      |
|----|----------------------------------------------------|--------------|------|-----|-----|------|
| 52 | Nitrobenzene                                       | 98-95-3      | 35.6 | 88  | 211 | H360 |
| 53 | Acetonitrile                                       | 75-05-8      | 36.6 | 2   | 82  | H319 |
| 54 | Dimethylformamide                                  | 68-12-2      | 36.7 | 58  | 153 | H360 |
| 55 | $\gamma$ -Valerolactone                            | 108-29-2     | 36.7 | 100 | 207 | None |
| 56 | Nitromethane                                       | 75-52-5      | 37.3 | 35  | 101 | H302 |
| 57 | Dimethylacetamide                                  | 127-19-5     | 37.8 | 70  | 166 | H360 |
| 58 | N,N-dimethyl lactamide <sup>a</sup>                | 35123-06-9   | 37.8 | 109 | 223 | H319 |
| 59 | 1,3-Dimethyl-3,4,5,6-tetrahydro-2(1H)-pyrimidinone | 7226-23-5    | 38.8 | 121 | 246 | H361 |
| 60 | $\gamma$ -Butyrolactone                            | 96-48-0      | 40.0 | 98  | 204 | H332 |
| 61 | Furfural                                           | 98-01-1      | 42.1 | 60  | 162 | H351 |
| 62 | Dimethyl sulfoxide                                 | 67-68-5      | 46.7 | 95  | 189 | None |
| 63 | Propylene carbonate                                | 108-32-7     | 64.0 | 116 | 242 | H319 |
| 64 | 3-Methoxy-N,N-dimethylpropanamide                  | 53185-52-7   | nd   | 99  | 215 | H361 |
| 65 | Ethyl-5-(dimethylamino)-2-methyl-5-oxopentanoate   | 1174627-68-9 | nd   | 119 | 214 | H319 |

Chemicals: 4,4'-(Hexafluoroisopropylidene)diphthalic anhydride (6FDA, >99%), 3,3'-Dihydroxybenzidine (HAB, >99%), 2,2-bis(4-aminophenyl)hexafluoropropane (6FpDA, >98%) and 2,4-Diaminomesitylene (DAM, >99%) were purchased from Apollo Scientific (Apollo Scientific, Manchester, United Kingdom) and used without additional purification. Anhydrous N-methyl-2-pyrrolidone (NMP),  $\gamma$ -Valerolactone (GVL), Dihydrolevoglucosenone (Cyrene), Dimethyl Isosorbide (DMI) and Dimethyl Carbonate (DMC) were purchased from Merck (Germany). 3-Methoxy-N,N-dimethylpropanamide (KJCPMA-100<sup>®</sup>) and Dimethylsulfoxide (DMSO) were kindly donated by AlephChem (Alephchem, Milano, Italy) and IMCD Pharmaceuticals (IMCD, Cleveland, Ohio, USA) respectively. The solvents were used as received. Imidization method was carried out through addition of acetic anhydride (Ac<sub>2</sub>O) and pyridine (Py), both purchased from Sigma-Aldrich (Sigma-Aldrich, St. Louis, Missouri, USA).

The general polymerization protocol is showed in Figure 1. An excess of acetic anhydride (20 mmol) and pyridine (15 mmol) were added to the poly(amic) acid solution.

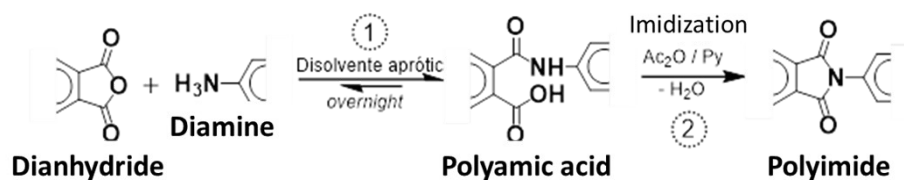

Figure S1. Scheme of the reactions involved in the synthesis of the polymers.

Polymer characterization: The molecular structure of polymers was confirmed by <sup>1</sup>H-NMR using the Agilent AV-400 spectrometer. The samples were dissolved in deuterated DMSO-*d*<sub>6</sub> and the measurements were taken at room temperature. Approximately, 10 mg of each polymer was dissolved in 0.6 mL of solvent. Molecular weights of the polyimides were determined by using gel permeation chromatography (GPC) after calibration with polystyrene standards. GPC measurements were performed at 40 °C using DMF as eluent on a Water 1525 Binary HPLC Pump equipped with polystyrene gel columns with different pore sizes, using a refractive index (RI) detector. The peak-average molecular weight (*M<sub>p</sub>*), number-average molecular weight (*M<sub>n</sub>*), weight-average molecular weight (*M<sub>w</sub>*), and polydispersity index (PDI) were determined. The chemical structure of polymers was

performed by attenuated total internal reflectance–Fourier transform infrared spectroscopy (ATR-FTIR) experiments at room temperature on a FT-IR Bruker Tensor 27 in a spectral range of 400 to 4000  $\text{cm}^{-1}$  with a resolution of 4  $\text{cm}^{-1}$ .

### Characterization of the polymers:

#### $^1\text{H-NMR}$ of the synthesized polymers

6FDA-AcHAB:  $^1\text{H-NMR}$  (400 MHz,  $\text{DMSO-}d_6$ )  $\delta$  8.23 (d,  $J = 8.0$  Hz, 2H,  $\text{H}_b$ ), 8.00 (d,  $J = 8.0$  Hz, 2H,  $\text{H}_c$ ), 7.86 (s, 2H,  $\text{H}_d$ ), 7.81 (d,  $J = 8.2$  Hz, 2H,  $\text{H}_e$ ), 7.79 (s, 2H,  $\text{H}_g$ ), 7.68 (d,  $J = 8.2$  Hz, 2H,  $\text{H}_f$ ), 2.17 (s, 6H,  $\text{H}_a$ ). FTIR-ATR  $\nu(\text{C=O symmetric})$  1778  $\text{cm}^{-1}$ ,  $\nu(\text{C=O asymmetric})$  1721  $\text{cm}^{-1}$ ,  $\nu(\text{C-N})$  1366  $\text{cm}^{-1}$  and  $\nu(\text{C-N-C})$  1086  $\text{cm}^{-1}$ .

6FDA-6FpDA:  $^1\text{H-NMR}$  (400 MHz,  $\text{DMSO-}d_6$ )  $\delta$  (ppm) 8.19 (d,  $J = 8.1$  Hz, 2H,  $\text{H}_b$ ), 7.96 (d,  $J = 8.1$  Hz, 2H,  $\text{H}_c$ ), 7.77 (s, 2H,  $\text{H}_d$ ), 7.63 (d,  $J = 8.6$  Hz, 4H,  $\text{H}_a$  y  $\text{H}_e$ ), 7.56 (d,  $J = 8.6$  Hz, 4H,  $\text{H}_f$  y  $\text{H}_g$ ). FTIR-ATR  $\nu(\text{C=O symmetric})$  1787  $\text{cm}^{-1}$ ,  $\nu(\text{C=O asymmetric})$  1725  $\text{cm}^{-1}$ ,  $\nu(\text{C-N})$  1364  $\text{cm}^{-1}$  and  $\nu(\text{C-N-C})$  1083  $\text{cm}^{-1}$ .

6FDA-DAM:  $^1\text{H-NMR}$  (400 MHz,  $\text{DMSO-}d_6$ )  $\delta$  8.17 (d,  $J = 7.6$  Hz, 2H,  $\text{H}_b$ ), 7.91 (m, 4H,  $\text{H}_c$  y  $\text{H}_d$ ), 7.31 (s, 1H,  $\text{H}_a$ ), 2.13 (s, 6H,  $\text{H}_f$ ), 1.91 (s, 3H,  $\text{H}_e$ ). FTIR-ATR  $\nu(\text{C=O symmetric})$  1787  $\text{cm}^{-1}$ ,  $\nu(\text{C=O asymmetric})$  1721  $\text{cm}^{-1}$ ,  $\nu(\text{C-N})$  1366  $\text{cm}^{-1}$  and  $\nu(\text{C-N-C})$  1086  $\text{cm}^{-1}$ .

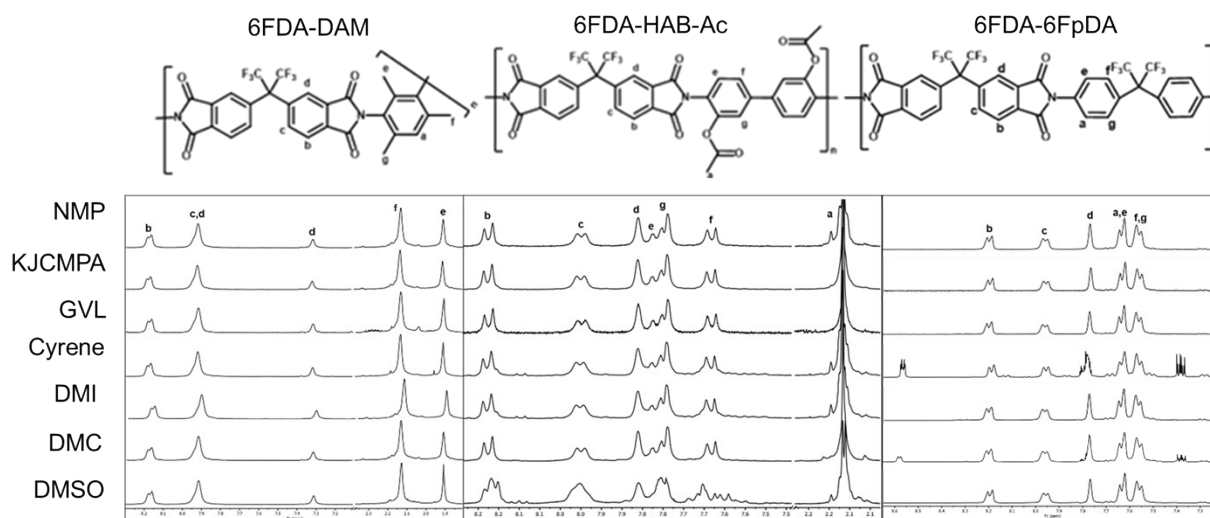

Figure S2.  $^1\text{H-NMR}$  in  $d_6$ -DMSO for the polymers synthesized in the different solvents

#### Solubility parameters reported in literature for the DMSO solvent.

Table S3. Some examples of reported HSP values for DMSO.

| Reference | Method                                    | $\delta_d$ ( $\text{MPa}^{1/2}$ ) | $\delta_p$ ( $\text{MPa}^{1/2}$ ) | $\delta_h$ ( $\text{MPa}^{1/2}$ ) | $\delta_T$ ( $\text{MPa}^{1/2}$ ) |
|-----------|-------------------------------------------|-----------------------------------|-----------------------------------|-----------------------------------|-----------------------------------|
| [1-3]*    | Solubility poly(ether sulfone) by DataFit | 18.4                              | 16.4                              | 10.2                              | 26.6                              |
| [4]       | HSPiP software                            | 18.4                              | 10.1                              | 11.1                              | 23.7                              |
| [5]       | Solubility test for a chemical            | 17.4                              | 14.2                              | 7.3                               | 23.6                              |
| [6]       | Group contribution                        | 18.4                              | 13.7                              | 11.3                              | 24.86                             |

|     |                                |      |      |      |       |
|-----|--------------------------------|------|------|------|-------|
| [7] | Cohesive energy                | 9.0  | 8.0  | 6.0  | 13.45 |
| [6] | Solubility test for a chemical | 19.3 | 16.4 | 10.2 | 27.3  |

\* This is the most repeated and employed value over the literature review.

### FTIR analysis

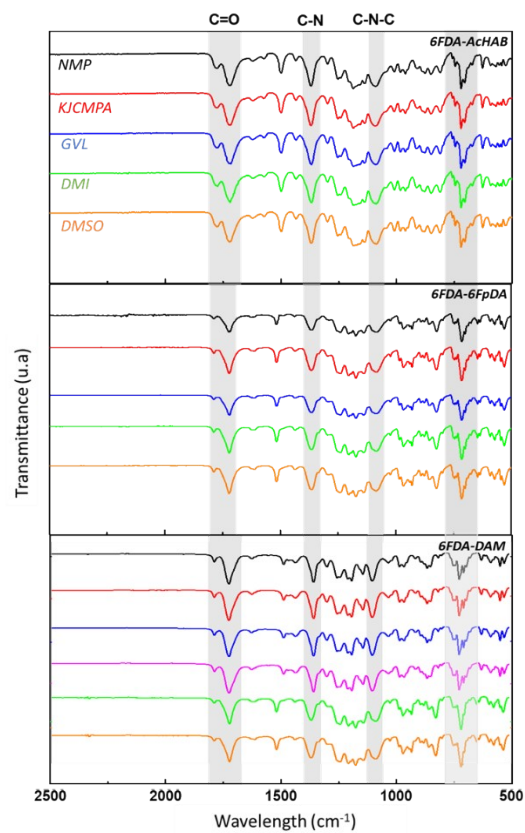

Figure S3. FTIR-ATR spectrum of the three polymers synthesized in the 6 selected solvents using NMP as reference.

## References

1. Gharagheizi, F. New procedure to calculate the Hansen solubility parameters of polymers. *Journal of Applied Polymer Science* **2007**, *103*, 31-36, doi:<https://doi.org/10.1002/app.23874>.
2. Sha, J.; Ma, T.; Huang, Z.; Hu, X.; Zhang, R.; Cao, Z.; Wan, Y.; Sun, R.; He, H.; Jiang, G.; et al. Solubility determination, model evaluation, Hansen solubility parameter and thermodynamic properties of benorilate in six pure solvents and two binary solvent mixtures. *The Journal of Chemical Thermodynamics* **2021**, *153*, 106301, doi:<https://doi.org/10.1016/j.jct.2020.106301>.
3. Özdemir, C.; Güner, A. Solubility profiles of poly(ethylene glycol)/solvent systems, I: Qualitative comparison of solubility parameter approaches. *European Polymer Journal* **2007**, *43*, 3068-3093, doi:<https://doi.org/10.1016/j.eurpolymj.2007.02.022>.
4. HSPiP. Hansen Solubility Parameters in Practice software. Available online: <http://www.hansen-solubility.com/> (accessed on 2024/05/30).
5. Alanazi, A.; Alshehri, S.; Altamimi, M.; Shakeel, F. Solubility determination and three dimensional Hansen solubility parameters of gefitinib in different organic solvents: Experimental and computational approaches. *Journal of Molecular Liquids* **2020**, *299*, 112211, doi:<https://doi.org/10.1016/j.molliq.2019.112211>.
6. Cao, Z.; Zhang, R.; Hu, X.; Sha, J.; Jiang, G.; Li, Y.; Li, T.; Ren, B. Thermodynamic modelling, Hansen solubility parameter and solvent effect of oxaprozin in thirteen pure solvents at different temperatures. *The Journal of Chemical Thermodynamics* **2020**, *151*, 106239, doi:<https://doi.org/10.1016/j.jct.2020.106239>.
7. Hansen, C.M. The Universality of the Solubility Parameter. *Product R&D* **1969**, *8*, 2-11, doi:10.1021/i360029a002.
